# Supplementary material for: Inactivation of mTORC2 in macrophages is a signature of colorectal cancer that promotes tumorigenesis
Source: JCI journal article supplement (doi:10.1172/jci.insight.124164), 2019-10-16

## Supplementary Figures

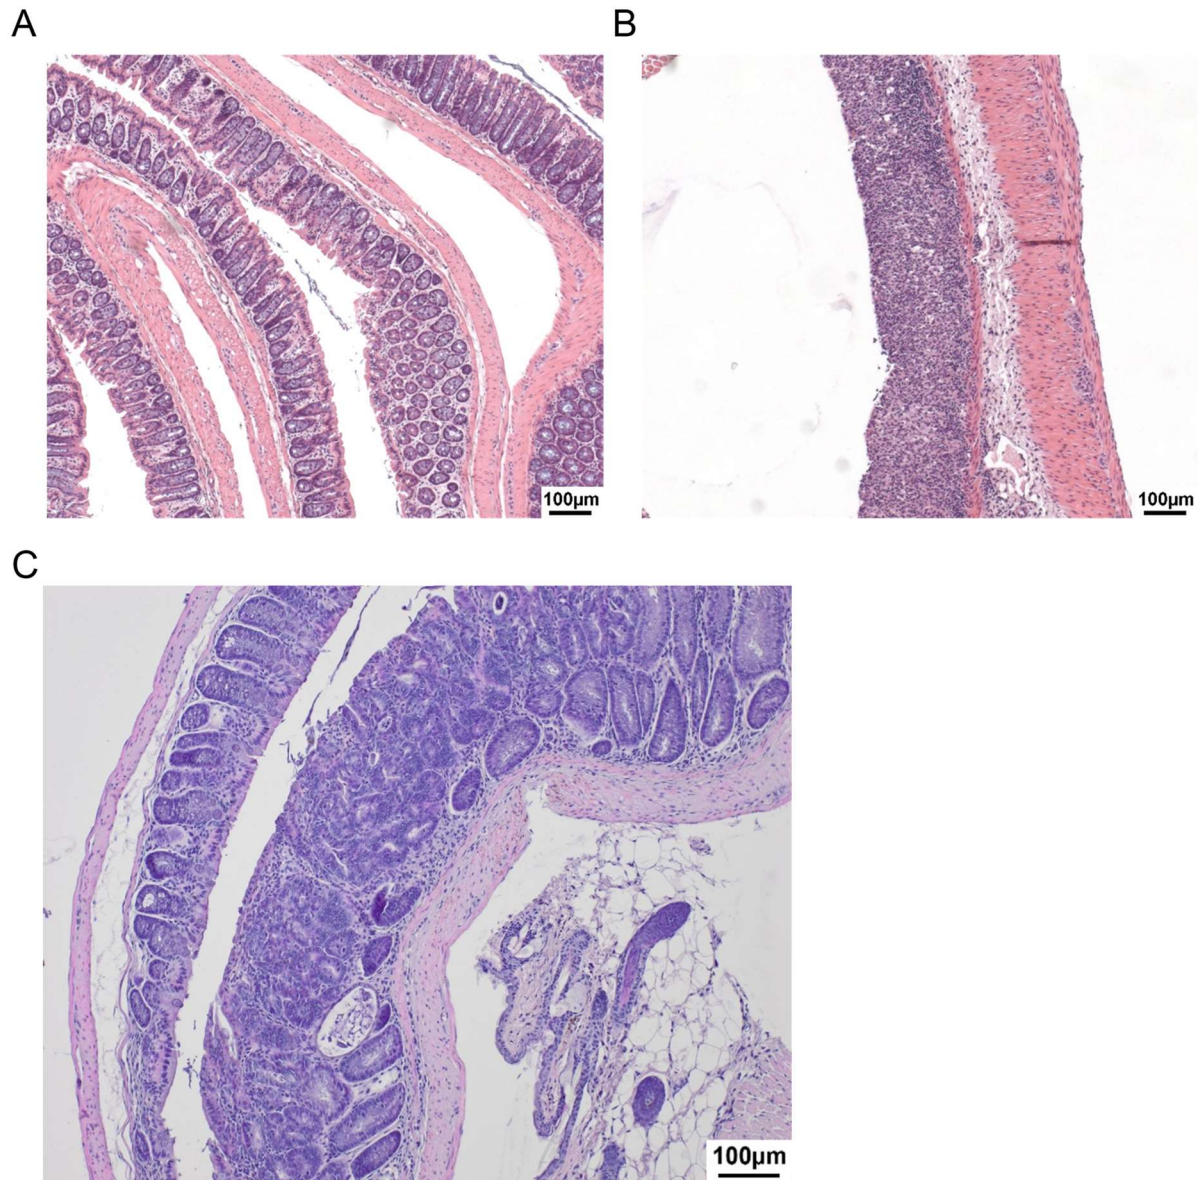

**Figure S1. Representative H&E examples of the mouse models.**

(A) H&E staining of a healthy colon from a wild type mouse. (B) Colon of a wild-type mouse treated with 5% DSS for five days and then with normal water for 3 days. (C) Colon of a wild-type mouse in the AOM/DSS model of day 61. The left side of the colon represents normal tissue, whereas on the right side a representative tumor tissue is shown.

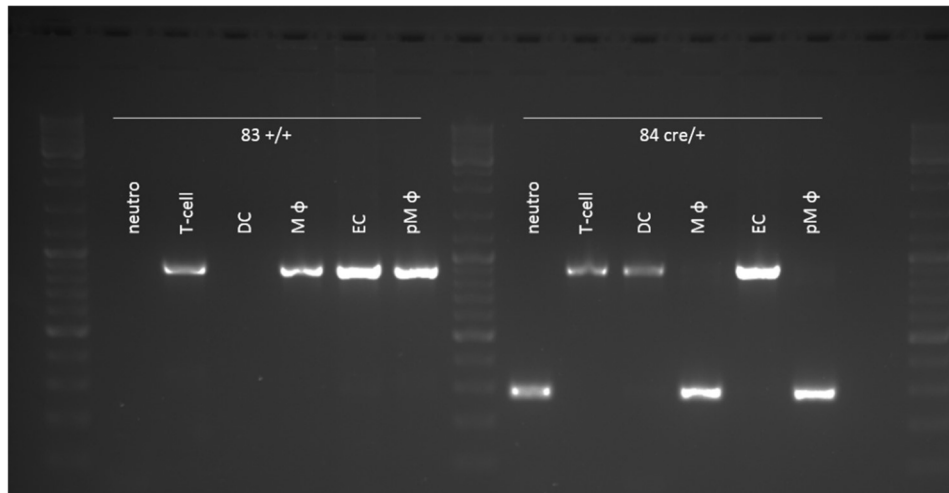

**Figure S2. Rictor is efficiently deleted in colonic macrophages.**

T-cells, dendritic cells, macrophages, epithelial cells were sorted from the colon of healthy mice. Peritoneal macrophages were isolated from the peritoneum. Recombination efficiency was detected by PCR as described in (63).

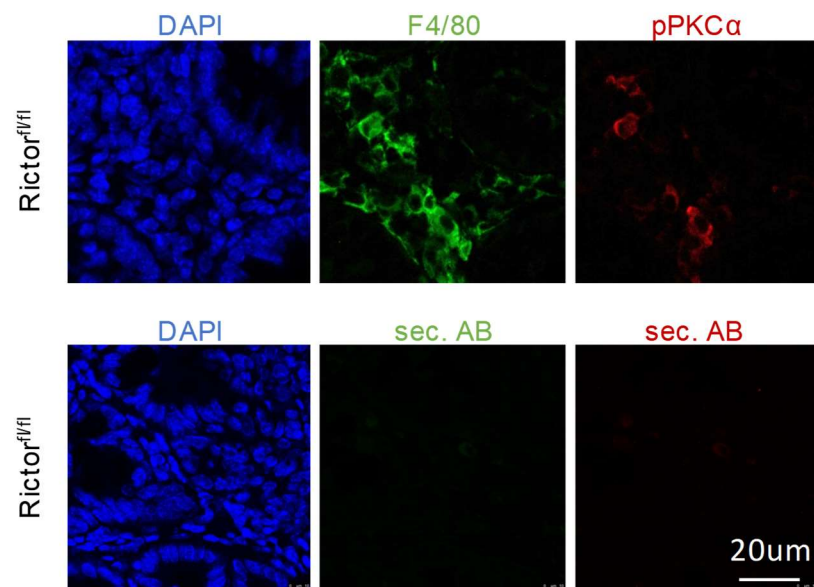

**Figure S3. Specificity of F4/80 and pPKC $\alpha$  antibodies.**

Immunofluorescence staining showing the *Rictor<sup>fl/fl</sup>* sample from Figure 3H (upper panel) together with a control staining with secondary antibodies only (lower panel).

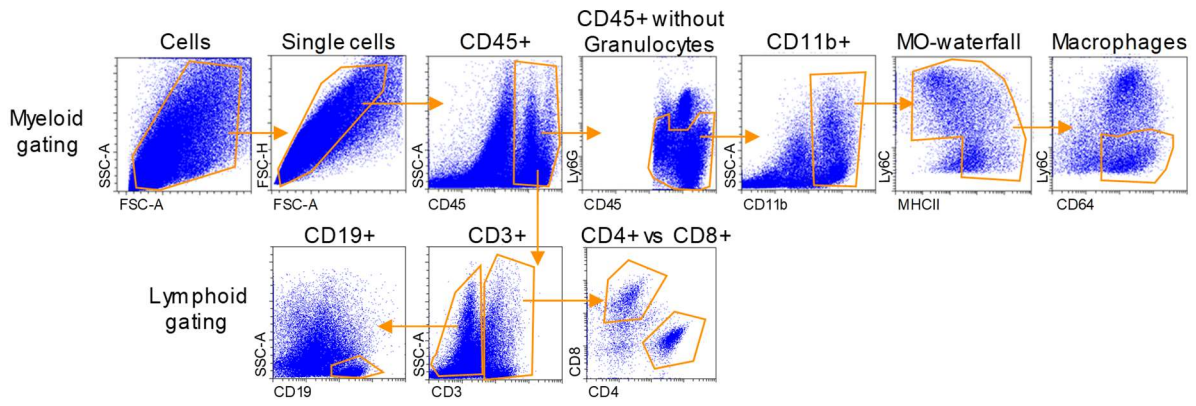

**Figure S4. Gating scheme of myeloid and lymphoid staining.**

Gating strategies for the myeloid and lymphoid staining are shown. The populations are defined as follows: leukocytes (CD45+), macrophages (CD45+ CD11b+ CD64+ MHCII+ Ly6C-), granulocytes (CD45+ CD11b+ Ly6G+), B-cells (CD45+ CD19+ MHCII+), CD4+ T-cells (CD45+ CD3+ CD4+) and CD8+ T-cells (CD45+ CD3+ CD8+).

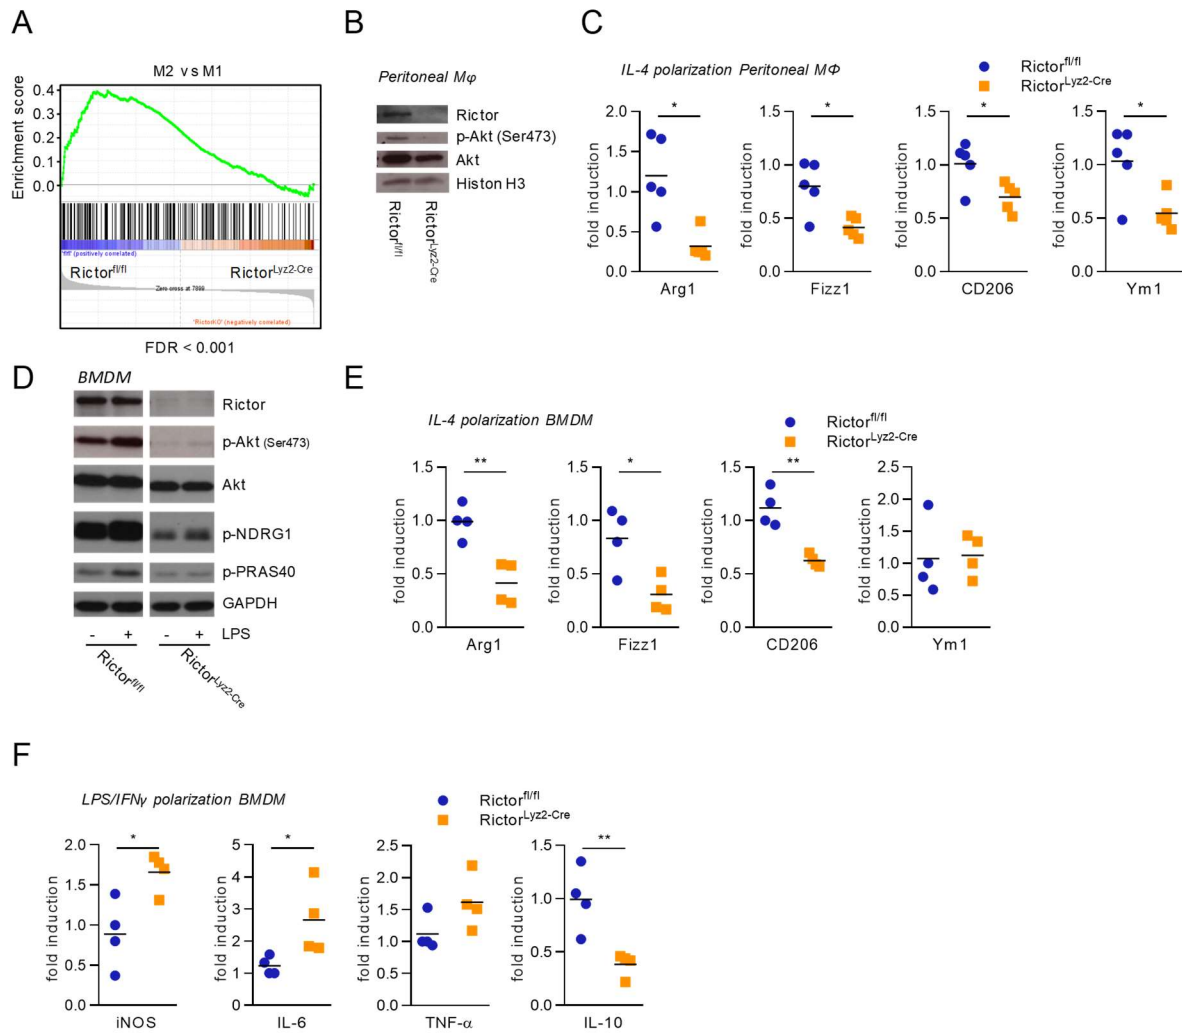

**Figure S5. Macrophage polarization of *Rictor<sup>fl/fl</sup>* and *Rictor<sup>Lyz2-Cre</sup>* mice.**

(A) Microarray data of sorted *Rictor<sup>fl/fl</sup>* and *Rictor<sup>Lyz2-Cre</sup>* colonic macrophages on day 8 during DSS-induced colitis was subjected to gene-set enrichment analysis (GSEA). GSEA plot of the M2 vs M1 signature in *Rictor<sup>fl/fl</sup>* colonic macrophages relative to *Rictor<sup>Lyz2-Cre</sup>* colonic macrophages is shown. (B) Immunoblot with the indicated antibodies of peritoneal macrophages. (C) Peritoneal macrophages were stimulated for 48 hours with 10 ng/ml IL-4. Levels of the indicated mRNAs were determined by RT-PCR, normalized to  $\beta$ -actin. (D) Immunoblot with the indicated antibodies of unstimulated BMDM and BMDM stimulated for 1 h with 100 ng/ml LPS. (E,F) BMDM were stimulated for 48 hours with 10 ng/ml IL-4 (E) or 100 ng/ml LPS and 20 ng/ml IFN $\gamma$  (F). Arg-1, Fizz1, CD206, YM1 and IL-10 were used as M2 markers while iNOS, IL-6 and TNF $\alpha$  were used as M1 markers. Lines represent the means (n $\geq$ 4). P values were determined by unpaired two-tailed Student's t-test. \*p < 0.05, \*\*p < 0.01.

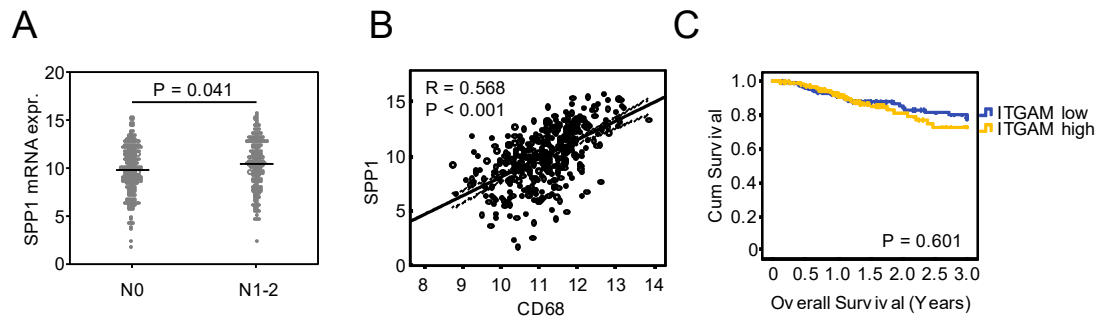

**Figure S6. SPP1 correlates with tumor size and poor survival in human colorectal cancer patients.**

(A) Comparison of SPP1 mRNA expression in colorectal primary tumor samples of negative (N0) and positive (N1-2) N stage in the TCGA dataset. (B) Scatter plot showing correlations between SPP1 and CD68. Regression lines with corresponding 95% confidence intervals are presented within the graph. (C) Kaplan Meier analysis of colorectal primary tumor samples distributed into low ( $n = 181$ ) and high ( $n = 180$ ) ITGAM expression (A-C) Data are displayed as log2 mRNA expression intensity. Unpaired two-tailed t-test was used to calculate p-values. To determine p-values for the Kaplan Meier analysis, we performed Log-rank test.

Uncropped blots for Fig. S5B

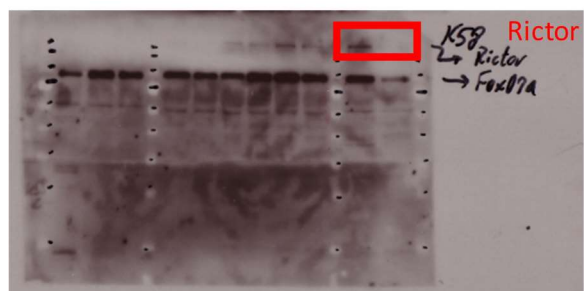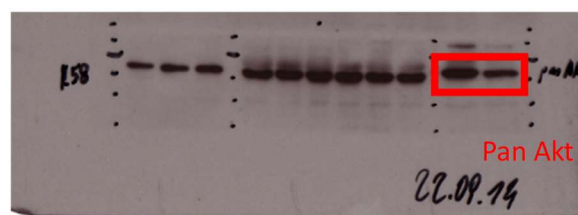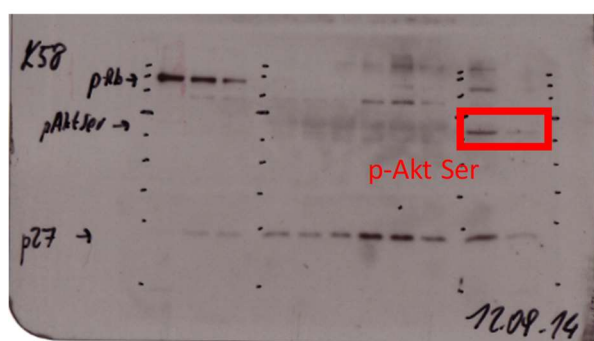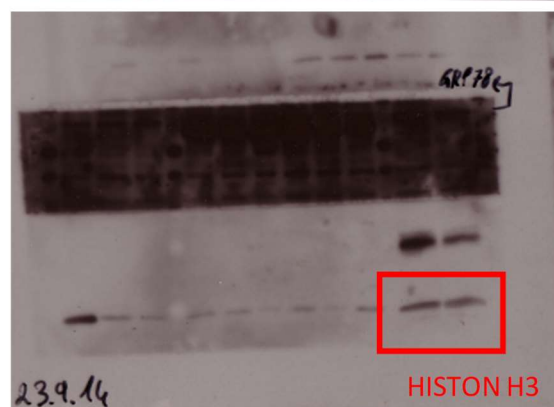



Western blot analysis showing Akt phosphorylation (pAkt Ser473) and total Akt levels. The blot is probed with anti-pAkt Ser473 (top) and anti-Akt (middle). Histone H9 (bottom) serves as a loading control. Two lanes are highlighted with red boxes, indicating increased pAkt Ser473 levels. Labels include 'K123', 'Rictor', 'pAkt Ser473', and 'Histone H9'.

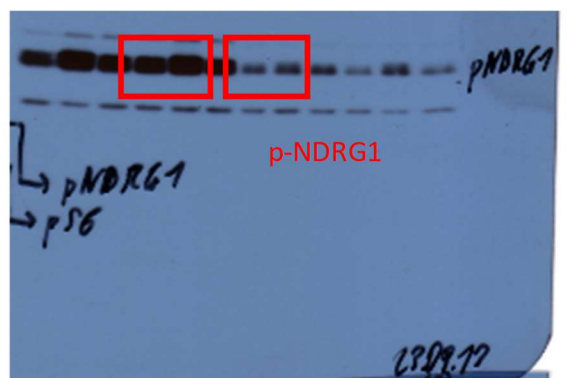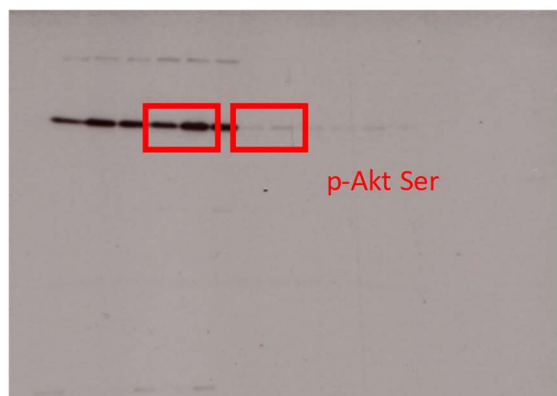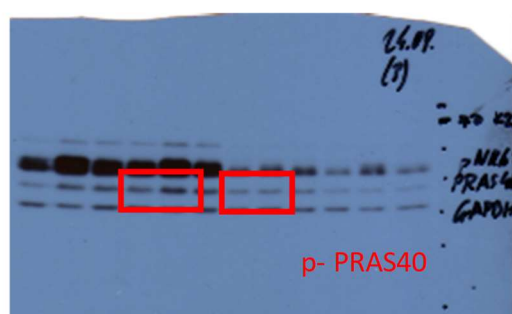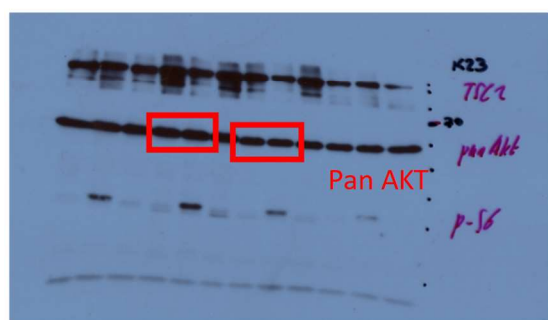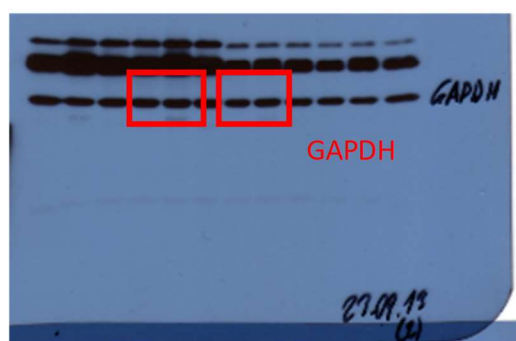

Supplement: sd1 [file 1]
